# Supplementary material for: Functional Characterization of the Saccharomyces cerevisiae Equilibrative Nucleoside Transporter 1 (ScENT1)
Source: PubMed Central journal article supplement (PMC6017673; doi:10.3390/molecules23040732), 2018-03-22
Supplement: molecules-23-00732-s001.pdf [file molecules-23-00732-s001.pdf]

## Supporting Information (Boswell-Casteel, et al.)

**Figure S1: Time-dependent uptake into Native and mutant ScENT1 proteoliposomes.** Shown here are representative assays of time-dependent uptake of (a) [<sup>3</sup>H]-uridine, (b) [<sup>3</sup>H]-cytidine, and (c) [<sup>3</sup>H]-UTP using 100 nM and 2000 nM substrate concentrations. Uptake was determined at 10, 20, 50, and 60 minutes. A linear fit to each data set was obtained using a nonlinear regression model with R<sup>2</sup> values listed in the figure legends (0,0 was not included in the fitting). 100 nM L390A (green), 2000 nM L390A (orange), 100 nM Native (WT, blue), 2000 nM Native (WT, magenta), 100 nM F249I (cyan), and 2000 nM F249I (red).

**Figure S2: Multiple sequence alignment with ScENT1 and other ENTs.** ScENT1 was aligned with other human ENTs 1-3 (hENT) and the *Leishmania donovani* (LdNT1.1) using the PROMALS3D webserver.<sup>(31,32)</sup> Strictly conserved residues are denoted in red and bolded, similar residues as determined by PROMALS3D are depicted in blue, the location of the ScENT1 TMDs are denoted by a string of T's, and mutated residues discussed in this article are boxed in.

**Figure S3: Electrostatic surface potentials of substrates relevant to C(2') modifications.** Electrostatic surface potentials were calculated using Gaussian 09 and mapped onto the noted substrates. Electrostatic surface potentials were normalized and ranged from - 0.09979 to 0.113 with lower potential values being represented by the cooler end of the spectrum (blue) and higher potential values are shown with warmer colors (red).

**Figure S4: Membrane integrity is maintained over a broad range of ethanol concentrations.**

Membrane integrity of CF loaded PLs (a) and empty liposomes (b) were tested by adding increasing concentrations of ethanol and collecting emission spectra to check for an increase in fluorescence signal that would signify permeabilization of the artificial membrane and release of CF. Ethanol concentrations ranged from 0 mM (green trace) to 4.074 M (red trace). The 517 nm (blue line) and 525 nm (red line) wavelengths are marked for a visual reference.

**Figure S5: Effects of residual alcohols on radiolabeled substrate uptake.** Substrates have been classified based on containing a pyrimidine or purine nucleobase and data represents the mean substrate uptake (pmol substrate / mg of ScENT1) as described for Figures 1 and 6, each substrate was tested at 100 nM final concentration in the assay sample mixture prepared in the absence of any residual alcohols. PLs were incubated with radiolabeled substrate for 3.5 hours followed by vacuum filtration onto membranes. Error represents the S.E.M. Statistical significance was determined by comparing mean substrate uptake of the (+ OH) preps to the (- OH) preps for Native (a), F249I (b), and L390A (c) using multiple unpaired t-test not corrected for multiple comparisons, consistent standard deviation was not assumed, and alpha was equal to 5.000%. Statistically significant changes are denoted in red (decrease) or green (increase). . ns, not significant; \*,  $p < 0.05$ ; \*\*,  $p < 0.01$ ; \*\*\*,  $p < 0.001$ ; \*\*\*\*,  $p < 0.0001$ .

**Figure S6: Comparison of radiolabeled substrate uptake between Native ScENT1 and mutants in the absence of alcohol.** Substrates have been classified based on containing a pyrimidine or purine nucleobase and data represents the mean substrate uptake (pmol substrate / mg of ScENT1) from no less than N=3 independent observations for each substrate tested at 100

nM final concentration in the assay sample mixture prepared in the absence of any residual alcohols. PLs were incubated with radiolabeled substrate for 3.5 hours followed by vacuum filtration onto membranes. Error bars represent the S.E.M. Statistical significance of the L390A and F249I PLs was determined by comparing the mean substrate uptake for each individual substrate to the mean substrate uptake of the respected Native PLs using two-way analysis of variance and Dunnett's multiple comparison test. Statistically significant changes are denoted in red (decrease) or green (increase) relative to Native ScENT1. Negative control PLs and substrate specific activity are included in the pmol substrate / mg ScENT1 calculation for each sample. ns, not significant; \*,  $p < 0.05$ ; \*\*,  $p < 0.01$ ; \*\*\*,  $p < 0.001$ ; \*\*\*\*,  $p < 0.0001$ .

**Table S1: Mulliken charges on the C(2') carbon atom of tested substrates containing C(2') modifications.** Mulliken charges were calculated using Gaussian 09 at the MP2/6-31g\*\* theory level following a tight geometry at the same level of theory. Charges were calculated *in vacuo* and fully solvated with water, and represent only the C(2') carbon of the ribose ring.

Figure S1 (Boswell-Casteel, et al.)

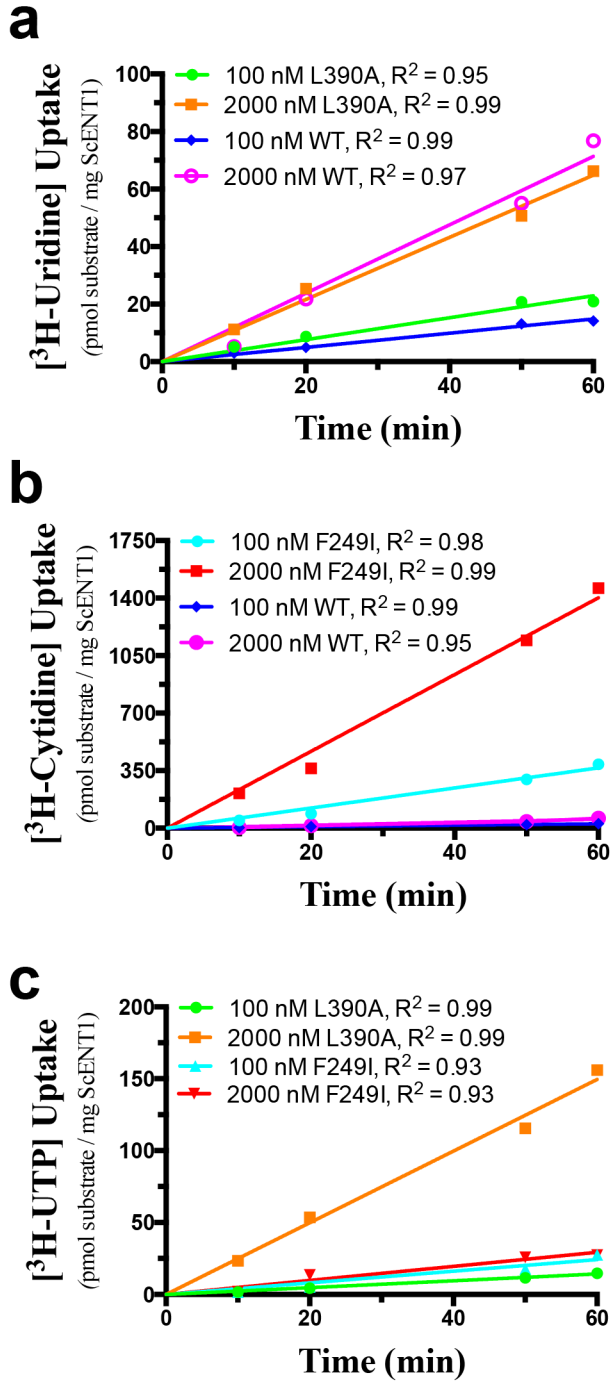

**Figure S2 (Boswell-Casteel, et al.)**

|             |     |                                                                                                                                                                                                                                                                                                                                                                                                                                                                                                                           |     |
|-------------|-----|---------------------------------------------------------------------------------------------------------------------------------------------------------------------------------------------------------------------------------------------------------------------------------------------------------------------------------------------------------------------------------------------------------------------------------------------------------------------------------------------------------------------------|-----|
| FUN26 TMDs: |     |                                                                                                                                                                                                                                                                                                                                                                                                                                                                                                                           |     |
| FUN26       | 1   | <b>M</b> -----STSADTDTIKKPI LAV <b>PE</b> PALADTHSEEISRSGEEHESENNEHSDEEGDNYSERE                                                                                                                                                                                                                                                                                                                                                                                                                                           | 56  |
| hENT1       | 1   | <b>M</b> -----TTS----- <b>HQPQ</b> -----DRY----                                                                                                                                                                                                                                                                                                                                                                                                                                                                           | 11  |
| hENT2       | 1   | <b>M</b> -----ARG----- <b>DAPR</b> -----DSY----                                                                                                                                                                                                                                                                                                                                                                                                                                                                           | 11  |
| hENT3       | 1   | <b>MAV</b> VEDDFQHSSNSTYRTTSSSLRADQEALLEKLLDRPPG <b>L</b> ----- <b>QRPE</b> -----DRF----                                                                                                                                                                                                                                                                                                                                                                                                                                  | 50  |
| LdENT1.1    | 1   | <b>M</b> -----DTAPDH----- <b>REPQ</b> -----EQGESRK                                                                                                                                                                                                                                                                                                                                                                                                                                                                        | 18  |
|             |     |                                                                                                                                                                                                                                                                                                                                                                                                                                                                                                                           |     |
| FUN26 TMDs: |     |                                                                                                                                                                                                                                                                                                                                                                                                                                                                                                                           |     |
| FUN26       | 57  | QSVSTEPLD <b>T</b> LPLR <b>K</b> KL---KNLS <b>Y</b> IT <b>F</b> <b>F</b> A <b>I</b> G <b>I</b> G <b>L</b> L <b>W</b> P <b>W</b> NC <b>L</b> S <b>A</b> S <b>O</b> <b>Y</b> F <b>K</b> H <b>D</b> I <b>F</b> K <b>D</b> T-----SI <b>W</b> A <b>K</b> I <b>F</b> T <b>S</b> S <b>M</b> M                                                                                                                                                                                                                                    | 122 |
| hENT1       | 12  | -----K <b>A</b> V <b>W</b> L <b>I</b> <b>F</b> <b>F</b> M <b>L</b> G <b>L</b> G <b>T</b> L <b>L</b> P <b>W</b> N <b>F</b> F <b>M</b> T <b>A</b> <b>Q</b> <b>Y</b> F <b>T</b> N <b>R</b> L <b>D</b> M <b>S</b> Q <b>N</b> V <b>S</b> L <b>V</b> T <b>A</b> E <b>L</b> S <b>K</b> D <b>A</b> Q <b>A</b> S <b>A</b> P <b>A</b> P <b>L</b> P <b>E</b> R <b>N</b> S <b>L</b> S <b>A</b> I <b>F</b> N <b>N</b> V <b>M</b> T                                                                                                     | 85  |
| hENT2       | 12  | -----H <b>L</b> V <b>G</b> I <b>S</b> <b>F</b> <b>F</b> I <b>L</b> G <b>L</b> G <b>T</b> L <b>L</b> P <b>W</b> N <b>F</b> F <b>I</b> T <b>A</b> I <b>P</b> <b>F</b> Q <b>A</b> R <b>L</b> A <b>G</b> A <b>G</b> N <b>S</b> T <b>A</b> R <b>I</b> L <b>S</b> T <b>N</b> -----H <b>T</b> C <b>P</b> E <b>D</b> A <b>F</b> N <b>N</b> W <b>V</b> T                                                                                                                                                                           | 72  |
| hENT3       | 51  | -----C <b>G</b> T <b>Y</b> I <b>I</b> <b>F</b> <b>F</b> S <b>I</b> G <b>I</b> G <b>S</b> L <b>L</b> P <b>W</b> N <b>F</b> F <b>I</b> T <b>A</b> K <b>E</b> <b>Y</b> <b>W</b> M <b>F</b> K <b>L</b> R <b>N</b> S <b>S</b> S <b>P</b> A <b>T</b> G <b>E</b> D-----P <b>E</b> G <b>S</b> D <b>I</b> L <b>N</b> <b>Y</b> F <b>E</b> S <b>Y</b> L <b>A</b>                                                                                                                                                                     | 108 |
| LdENT1.1    | 19  | <b>W</b> -----Y <b>E</b> M <b>T</b> A <b>S</b> E <b>F</b> <b>Y</b> <b>V</b> <b>V</b> A <b>F</b> M <b>C</b> G <b>V</b> S <b>M</b> M <b>P</b> <b>V</b> N <b>A</b> V <b>F</b> S <b>A</b> P <b>A</b> <b>Y</b> I <b>M</b> T <b>Y</b> R <b>Y</b> A <b>M</b> Q <b>D</b> E <b>A</b> V <b>P</b> L <b>Y</b> -----T <b>N</b> F <b>W</b> N <b>N</b> V <b>M</b> T <b>Y</b> <b>N</b> L <b>I</b> G                                                                                                                                       | 86  |
|             |     |                                                                                                                                                                                                                                                                                                                                                                                                                                                                                                                           |     |
| FUN26 TMDs: |     |                                                                                                                                                                                                                                                                                                                                                                                                                                                                                                                           |     |
| FUN26       | 123 | S <b>F</b> S <b>T</b> I <b>S</b> S <b>M</b> L <b>F</b> N <b>I</b> <b>Y</b> L <b>A</b> K <b>R</b> Q <b>Y</b> K <b>Y</b> S--R <b>V</b> I <b>N</b> G <b>L</b> <b>W</b> <b>V</b> E <b>I</b> I <b>V</b> T <b>M</b> C <b>F</b> T <b>I</b> L <b>H</b> F <b>L</b> L <b>P</b> K--W <b>F</b> N <b>F</b> M <b>F</b> I <b>M</b> L <b>V</b> V <b>I</b> S--S <b>M</b> G <b>T</b> A <b>M</b> T <b>Q</b> N <b>G</b> I <b>M</b> A <b>I</b> A <b>N</b> V <b>F</b> G <b>S</b> E <b>Y</b> S <b>Q</b> G                                        | 212 |
| hENT1       | 86  | L <b>C</b> A <b>M</b> L <b>P</b> L <b>L</b> L <b>F</b> T <b>Y</b> L <b>N</b> S <b>F</b> L <b>H</b> Q <b>R</b> I <b>P</b> Q <b>S</b> V <b>R</b> I <b>L</b> G <b>S</b> L <b>V</b> A <b>I</b> L <b>L</b> V <b>L</b> I <b>T</b> A <b>I</b> L <b>V</b> K <b>V</b> Q--L <b>D</b> A--L <b>P</b> <b>F</b> <b>V</b> I <b>T</b> M <b>I</b> K <b>I</b> V <b>L</b> I--N <b>S</b> F <b>G</b> A <b>I</b> L <b>Q</b> G <b>S</b> L <b>P</b> G <b>L</b> A <b>G</b> L <b>L</b> P <b>A</b> S <b>Y</b> T <b>A</b> P                           | 175 |
| hENT2       | 73  | L <b>L</b> S <b>Q</b> L <b>P</b> L <b>L</b> L <b>F</b> T <b>L</b> L <b>N</b> S <b>F</b> L <b>Y</b> Q <b>C</b> V <b>P</b> E <b>T</b> <b>V</b> R <b>I</b> L <b>G</b> S <b>L</b> A <b>L</b> L <b>L</b> L <b>F</b> A <b>L</b> T <b>A</b> A <b>L</b> V <b>K</b> V <b>D</b> --M <b>S</b> P--G <b>P</b> F <b>S</b> I <b>T</b> M <b>A</b> S <b>V</b> C <b>F</b> I--N <b>S</b> F <b>S</b> A <b>V</b> L <b>Q</b> G <b>S</b> L <b>P</b> G <b>L</b> G <b>I</b> M <b>P</b> S <b>T</b> Y <b>S</b> T <b>L</b>                            | 162 |
| hENT3       | 109 | V <b>A</b> S <b>T</b> V <b>P</b> S <b>M</b> L <b>C</b> L <b>V</b> A <b>N</b> F <b>L</b> V <b>N</b> R <b>V</b> A <b>V</b> H <b>I</b> R <b>V</b> L <b>A</b> S <b>L</b> T <b>V</b> I <b>L</b> A <b>I</b> F <b>M</b> V <b>I</b> T <b>A</b> L <b>V</b> K <b>V</b> D--T <b>S</b> S <b>W</b> T <b>R</b> G <b>F</b> F <b>A</b> V <b>T</b> I <b>V</b> C <b>M</b> V <b>I</b> L--S <b>G</b> A <b>S</b> T <b>V</b> F <b>S</b> S <b>S</b> I <b>Y</b> G <b>M</b> T <b>G</b> S <b>F</b> P <b>M</b> R <b>N</b> S <b>Q</b> A               | 200 |
| LdENT1.1    | 87  | I <b>V</b> T <b>S</b> L <b>I</b> M <b>E</b> P <b>L</b> T <b>L</b> L <b>S</b> --W <b>F</b> R <b>R</b> I <b>P</b> M <b>K</b> V <b>R</b> L <b>L</b> G <b>L</b> V <b>L</b> I <b>V</b> E <b>I</b> I <b>V</b> L <b>M</b> V <b>P</b> A <b>R</b> G--T <b>S</b> E--A <b>G</b> A <b>V</b> A <b>T</b> I <b>C</b> C <b>T</b> G <b>F</b> I <b>G</b> G <b>F</b> G <b>K</b> S <b>I</b> F <b>E</b> S <b>T</b> Y <b>G</b> M <b>F</b> G <b>A</b> F <b>P</b> S <b>S</b> T <b>S</b> T                                                         | 174 |
|             |     |                                                                                                                                                                                                                                                                                                                                                                                                                                                                                                                           |     |
| FUN26 TMDs: |     |                                                                                                                                                                                                                                                                                                                                                                                                                                                                                                                           |     |
| FUN26       | 213 | V <b>M</b> <b>C</b> Q <b>A</b> V <b>A</b> G <b>V</b> L <b>P</b> S <b>L</b> V <b>L</b> F <b>A</b> L <b>A</b> F <b>I</b> E <b>N</b> S <b>S</b> --V <b>T</b> T <b>G</b> G <b>I</b> L <b>L</b> L <b>P</b> <b>T</b> <b>T</b> L <b>V</b> V <b>T</b> I <b>C</b> V <b>M</b> F <b>S</b> V <b>S</b> K <b>I</b> S <b>R</b> K <b>V</b> N <b>E</b> N <b>W</b> N <b>V</b> E <b>D</b> G <b>H</b> I <b>T</b> D <b>V</b> L <b>G</b> S <b>L</b> R <b>S</b> N <b>E</b> E <b>E</b> I <b>R</b> --I <b>V</b> G <b>R</b> I                       | 304 |
| hENT1       | 176 | I <b>M</b> S <b>G</b> L <b>A</b> G <b>F</b> F <b>A</b> S <b>V</b> A <b>M</b> I <b>C</b> A <b>I</b> A <b>S</b> G <b>S</b> E--L <b>S</b> E <b>S</b> A <b>F</b> G <b>Y</b> F <b>H</b> I <b>T</b> A <b>C</b> A <b>V</b> I <b>I</b> L <b>T</b> I <b>C</b> <b>Y</b> L <b>G</b> I <b>P</b> R <b>I</b> -----E--F <b>Y</b> R <b>Y</b> Y <b>Q</b> L <b>K</b> E <b>G</b> P <b>G</b> E <b>Q</b> E <b>T</b> --K <b>I</b> D <b>L</b> I                                                                                                  | 253 |
| hENT2       | 163 | F <b>L</b> S <b>C</b> Q <b>L</b> A <b>G</b> I <b>F</b> A <b>A</b> L <b>A</b> M <b>L</b> L <b>S</b> M <b>A</b> S <b>G</b> V <b>D</b> ---A <b>E</b> T <b>S</b> A <b>L</b> G <b>Y</b> F <b>H</b> I <b>T</b> P <b>C</b> V <b>G</b> I <b>L</b> M <b>S</b> I <b>V</b> C <b>Y</b> L <b>S</b> L <b>P</b> H <b>L</b> -----K--F <b>A</b> R <b>Y</b> Y <b>L</b> A <b>N</b> K <b>S</b> S <b>Q</b> A <b>Q</b> A <b>Q</b> E <b>L</b> T <b>K</b> A <b>E</b> L <b>L</b>                                                                   | 242 |
| hENT3       | 201 | L <b>I</b> S <b>G</b> A <b>M</b> G <b>G</b> T <b>V</b> S <b>A</b> V <b>A</b> S <b>L</b> V <b>D</b> L <b>A</b> A <b>S</b> S <b>D</b> ---V <b>R</b> N <b>S</b> A <b>L</b> A <b>H</b> F <b>L</b> T <b>A</b> I <b>V</b> F <b>L</b> V <b>L</b> C <b>M</b> G <b>L</b> <b>L</b> L <b>S</b> R <b>L</b> -----E--Y <b>A</b> R <b>Y</b> Y <b>M</b> R <b>P</b> V <b>L</b> A <b>A</b> H <b>V</b> F <b>S</b> G <b>E</b> -----                                                                                                           | 273 |
| LdENT1.1    | 175 | M <b>M</b> C <b>V</b> G <b>M</b> S <b>G</b> V <b>L</b> T <b>S</b> L <b>L</b> Q <b>I</b> I <b>V</b> K <b>A</b> L <b>P</b> D <b>S</b> Y <b>E</b> G <b>V</b> K <b>K</b> O <b>S</b> K <b>Y</b> <b>L</b> G <b>L</b> D <b>V</b> G <b>I</b> Q <b>G</b> M <b>T</b> F <b>V</b> A <b>L</b> I <b>L</b> L <b>R</b> F <b>N</b> -----S--F <b>A</b> Q <b>N</b> Y <b>F</b> G <b>D</b> L <b>G</b> A <b>V</b> K <b>S</b> V <b>D</b> A <b>G</b> L <b>S</b> A <b>E</b> A                                                                      | 258 |
|             |     |                                                                                                                                                                                                                                                                                                                                                                                                                                                                                                                           |     |
| FUN26 TMDs: |     |                                                                                                                                                                                                                                                                                                                                                                                                                                                                                                                           |     |
| FUN26       | 305 | D <b>Q</b> M <b>E</b> D <b>E</b> D <b>H</b> R <b>R</b> T-----N <b>G</b> T <b>R</b> D <b>D</b> N <b>D</b> E <b>G</b> E <b>L</b> Q <b>L</b> K <b>V</b> P <b>F</b> E <b>V</b> L <b>F</b> A <b>K</b> L <b>K</b> <b>Y</b> L <b>V</b> L <b>S</b> I <b>F</b> T <b>F</b> V <b>V</b> T <b>L</b> -V <b>I</b> P <b>V</b> F <b>A</b> S                                                                                                                                                                                                | 363 |
| hENT1       | 254 | S <b>K</b> G <b>E</b> E <b>P</b> R <b>A</b> C <b>K</b> -----E <b>E</b> S <b>G</b> V <b>S</b> V <b>S</b> N <b>S</b> Q <b>P</b> T <b>N</b> E <b>S</b> H <b>S</b> I <b>K</b> A <b>I</b> L <b>K</b> N <b>I</b> S <b>V</b> L <b>A</b> F <b>S</b> V <b>C</b> F <b>I</b> F <b>I</b> T <b>I</b> G <b>M</b> F <b>P</b> A <b>V</b> T <b>V</b>                                                                                                                                                                                       | 312 |
| hENT2       | 243 | Q <b>S</b> D <b>E</b> N <b>G</b> I <b>P</b> S <b>S</b> P <b>Q</b> K <b>V</b> A <b>L</b> T-----L <b>D</b> L <b>D</b> L <b>E</b> K <b>E</b> P <b>E</b> S <b>E</b> P <b>D</b> E <b>P</b> Q <b>K</b> P <b>G</b> K <b>P</b> S <b>V</b> F <b>T</b> V <b>F</b> Q <b>I</b> W <b>L</b> T <b>A</b> L <b>C</b> I <b>V</b> L <b>V</b> F <b>V</b> T <b>L</b> S <b>V</b> F <b>A</b> I <b>T</b> A                                                                                                                                        | 313 |
| hENT3       | 274 | ---E <b>E</b> L <b>P</b> Q <b>D</b> -----S <b>L</b> S <b>A</b> P <b>S</b> V <b>A</b> S <b>R</b> F <b>I</b> D <b>S</b> H <b>T</b> P <b>P</b> L <b>R</b> P <b>I</b> L <b>K</b> K <b>T</b> A <b>S</b> I <b>G</b> F <b>C</b> V <b>T</b> Y <b>V</b> F <b>F</b> I <b>T</b> S <b>L</b> I <b>Y</b> P <b>A</b> I <b>C</b> T                                                                                                                                                                                                        | 328 |
| LdENT1.1    | 259 | L <b>C</b> H <b>T</b> D <b>E</b> H <b>P</b> T <b>H</b> D <b>K</b> E <b>G</b> R <b>N</b> S <b>S</b> S <b>G</b> E <b>V</b> P <b>A</b> L <b>G</b> E <b>V</b> Q <b>T</b> A <b>A</b> A <b>K</b> S <b>E</b> G <b>P</b> D <b>A</b> V <b>E</b> S <b>S</b> W <b>H</b> E <b>V</b> E <b>G</b> P <b>T</b> S <b>N</b> E <b>I</b> L <b>V</b> A <b>T</b> A <b>I</b> F <b>S</b> T <b>L</b> R <b>R</b> V <b>K</b> W <b>M</b> F <b>V</b> A <b>C</b> A <b>F</b> N <b>F</b> L <b>I</b> T <b>L</b> F <b>L</b> E <b>P</b> G <b>I</b> A <b>V</b> | 353 |
|             |     |                                                                                                                                                                                                                                                                                                                                                                                                                                                                                                                           |     |
| FUN26 TMDs: |     |                                                                                                                                                                                                                                                                                                                                                                                                                                                                                                                           |     |
| FUN26       | 364 | A <b>T</b> Y <b>V</b> T <b>G</b> L---P <b>L</b> S <b>N</b> A <b>Q</b> Y <b>I</b> P <b>L</b> -I <b>F</b> T <b>L</b> W <b>N</b> I <b>G</b> L <b>I</b> G <b>R</b> V <b>I</b> A <b>D</b> W <b>P</b> M---F <b>R</b> D <b>Q</b> K <b>F</b> T <b>P</b> R <b>K</b> T <b>F</b> I <b>Y</b> S <b>L</b> I <b>R</b> V <b>A</b> A <b>I</b> P <b>L</b> F <b>L</b> M <b>F</b> T <b>A</b> I <b>T</b> S <b>S</b> S <b>S</b> G <b>D</b> E <b>E</b> H <b>N</b> G <b>S</b> V <b>I</b> D <b>I</b> C                                             | 450 |
| hENT1       | 313 | E <b>V</b> K <b>S</b> S <b>I</b> A <b>G</b> --S <b>T</b> W <b>E</b> R <b>Y</b> F <b>I</b> V <b>S</b> C <b>L</b> T <b>F</b> N <b>I</b> F <b>M</b> L <b>G</b> R <b>S</b> L <b>T</b> A <b>V</b> F <b>M</b> W---P <b>G</b> K <b>D</b> S <b>R</b> W <b>L</b> P <b>S</b> L <b>V</b> L <b>A</b> R <b>I</b> V <b>F</b> V <b>P</b> L <b>L</b> L <b>C</b> N <b>I</b> K <b>P</b> R <b>R</b> Y-----L <b>T</b> V <b>V</b> F <b>E</b> H <b>D</b> A <b>W</b>                                                                             | 395 |
| hENT2       | 314 | M <b>V</b> T <b>S</b> T <b>S</b> T <b>S</b> P---G <b>K</b> W <b>S</b> Q <b>F</b> N <b>P</b> I <b>C</b> C <b>F</b> L <b>L</b> F <b>N</b> I <b>M</b> L <b>G</b> R <b>S</b> L <b>T</b> S <b>Y</b> F <b>L</b> W---P <b>D</b> E <b>S</b> R <b>L</b> L <b>P</b> L <b>V</b> C <b>L</b> R <b>F</b> L <b>V</b> P <b>L</b> F <b>M</b> L <b>C</b> H <b>V</b> P <b>Q</b> R <b>S</b> R---L <b>P</b> I <b>P</b> Q <b>D</b> A <b>Y</b>                                                                                                   | 395 |
| hENT3       | 329 | N <b>I</b> E <b>S</b> L <b>N</b> K <b>G</b> S <b>G</b> S <b>L</b> W <b>T</b> T <b>K</b> F <b>I</b> P <b>L</b> T <b>T</b> F <b>L</b> <b>N</b> F <b>A</b> D <b>I</b> C <b>R</b> Q <b>L</b> T <b>A</b> W <b>I</b> Q <b>V</b> ---P <b>G</b> P <b>N</b> S <b>K</b> A <b>L</b> P <b>G</b> F <b>V</b> I <b>L</b> R <b>T</b> C <b>L</b> I <b>P</b> L <b>F</b> V <b>L</b> C <b>N</b> Y <b>Q</b> P <b>R</b> V <b>H</b> L---K <b>T</b> V <b>V</b> F <b>Q</b> S <b>D</b> V <b>Y</b>                                                   | 414 |
| LdENT1.1    | 354 | G <b>M</b> F <b>P</b> D <b>S</b> -----K <b>W</b> F <b>S</b> T <b>I</b> A <b>V</b> F <b>I</b> E <b>N</b> V <b>F</b> L <b>M</b> L <b>G</b> R <b>F</b> S <b>P</b> S <b>L</b> K <b>I</b> M <b>W</b> P <b>R</b> ---S <b>Y</b> K <b>R</b> W <b>I</b> I <b>V</b> A <b>A</b> S <b>F</b> A <b>R</b> V <b>I</b> F <b>V</b> P <b>L</b> L <b>L</b> L <b>H</b> S <b>Y</b> H-----Y <b>I</b> P <b>G</b> E <b>A</b> Y                                                                                                                     | 424 |
|             |     |                                                                                                                                                                                                                                                                                                                                                                                                                                                                                                                           |     |
| FUN26 TMDs: |     |                                                                                                                                                                                                                                                                                                                                                                                                                                                                                                                           |     |
| FUN26       | 451 | Y <b>M</b> L <b>L</b> Q <b>L</b> F <b>L</b> G <b>V</b> T <b>N</b> G <b>I</b> V <b>I</b> S <b>M</b> S <b>F</b> M <b>K</b> V <b>P</b> E <b>Q</b> ---L <b>D</b> N <b>D</b> D <b>E</b> K <b>E</b> A <b>A</b> G <b>G</b> F <b>T</b> N <b>I</b> F <b>V</b> S <b>T</b> G <b>L</b> A <b>L</b> G <b>S</b> I <b>I</b> S <b>Y</b> V <b>F</b> V <b>F</b> I <b>D</b> F <b>I</b> I <b>R</b>                                                                                                                                             | 517 |
| hENT1       | 396 | F <b>I</b> F <b>M</b> A <b>A</b> F <b>A</b> F <b>S</b> N <b>G</b> <b>I</b> L <b>A</b> S <b>L</b> C <b>M</b> C <b>F</b> G <b>P</b> K <b>K</b> ---V--K <b>P</b> A <b>E</b> A <b>E</b> T <b>A</b> G <b>A</b> I <b>M</b> A <b>F</b> F <b>L</b> C <b>I</b> G <b>L</b> A <b>L</b> G <b>A</b> V <b>F</b> S <b>F</b> L <b>E</b> R <b>A</b> I <b>V</b> ----                                                                                                                                                                        | 456 |
| hENT2       | 396 | F <b>I</b> T <b>F</b> M <b>L</b> L <b>F</b> A <b>V</b> S <b>N</b> G <b>I</b> L <b>V</b> S <b>L</b> T <b>M</b> C <b>L</b> A <b>P</b> R <b>Q</b> ---V--L <b>P</b> H <b>E</b> R <b>E</b> V <b>A</b> G <b>A</b> I <b>M</b> T <b>F</b> F <b>L</b> A <b>I</b> G <b>L</b> S <b>C</b> G <b>A</b> S <b>I</b> S <b>F</b> L <b>K</b> A <b>L</b> L----                                                                                                                                                                                | 456 |
| hENT3       | 415 | P <b>A</b> L <b>L</b> S <b>S</b> L <b>L</b> G <b>L</b> S <b>N</b> G <b>I</b> L <b>S</b> T <b>L</b> A <b>L</b> L <b>Y</b> G <b>P</b> K <b>I</b> ---V--P <b>R</b> E <b>L</b> A <b>E</b> A <b>T</b> G <b>V</b> M <b>S</b> F <b>Y</b> V <b>C</b> I <b>G</b> L <b>T</b> L <b>G</b> S <b>A</b> C <b>S</b> T <b>L</b> L <b>V</b> H <b>L</b> I----                                                                                                                                                                                | 475 |
| LdENT1.1    | 425 | G <b>Y</b> V <b>M</b> E <b>V</b> I <b>F</b> G <b>F</b> S <b>N</b> G <b>I</b> V <b>G</b> S <b>M</b> A <b>L</b> V <b>L</b> G <b>P</b> Q <b>S</b> K <b>G</b> I <b>D</b> -N <b>D</b> G <b>K</b> R <b>F</b> V <b>A</b> G <b>T</b> L <b>M</b> G <b>I</b> S <b>I</b> L <b>V</b> G <b>G</b> T <b>I</b> G <b>T</b> V <b>L</b> S <b>I</b> M <b>T</b> Q <b>T</b> I <b>R</b> A <b>T</b> Y--                                                                                                                                           | 491 |

■ Strictly Conserved      TTT TMDs Located in FUN26  
■ Similar Residues          □ Mutated Residues

Figure S3 (Boswell-Casteel, et al.)

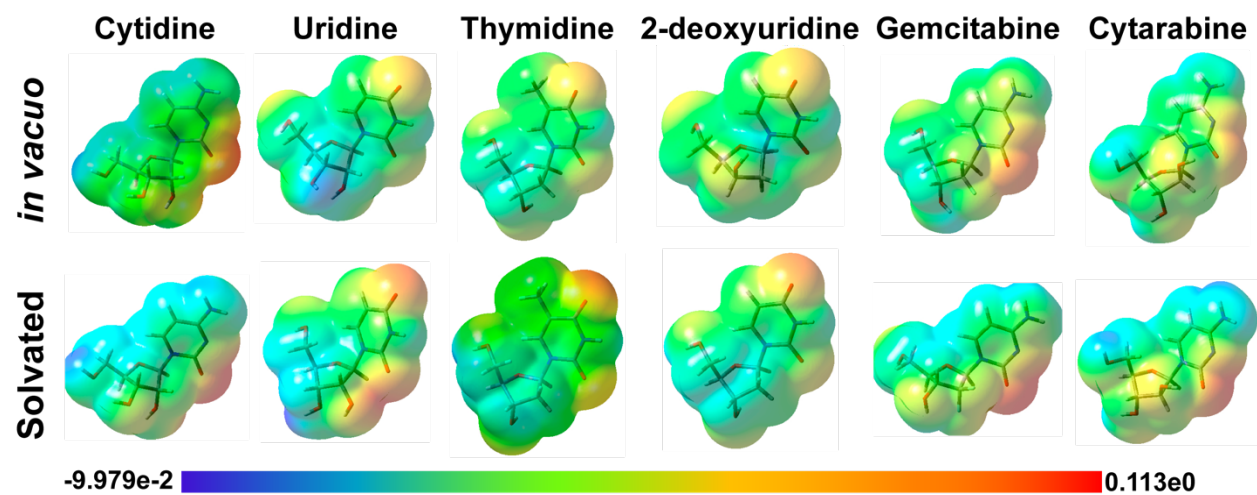

Figure S4 (Boswell-Casteel, et al.)

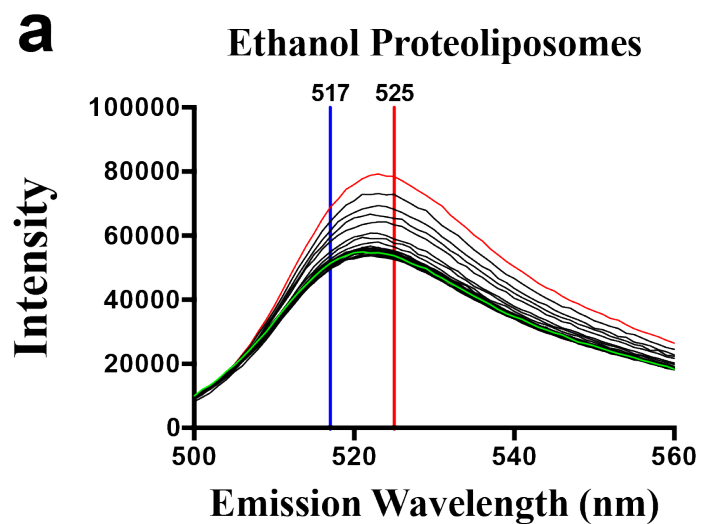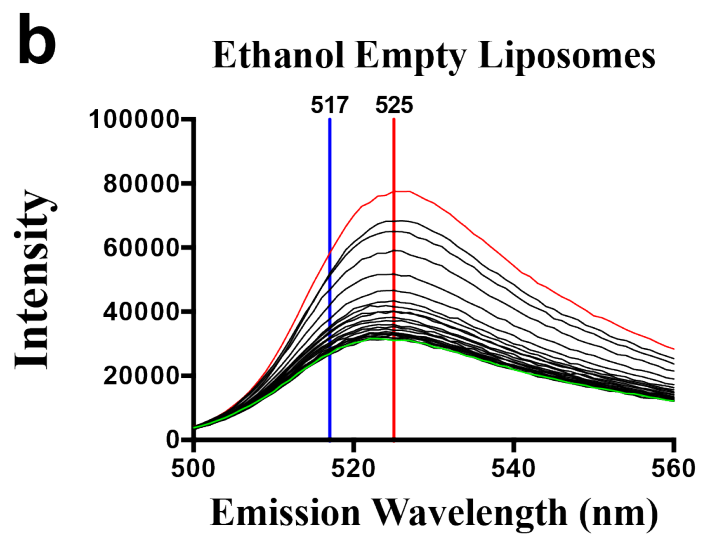

Figure S5 (Boswell-Casteel, et al.)

**a**

|               |                   | Substrate           | Native (+OH)  | Native (-OH)  | Significance |
|---------------|-------------------|---------------------|---------------|---------------|--------------|
| <b>Native</b> | <b>Pyrimidine</b> | [3H]-UTP            | 0.354 ± 0.28  | 24.6 ± 3.9    | (**)         |
|               |                   | [3H]-Uridine        | 88.7 ± 4.7    | 46.9 ± 5.4    | (***)        |
|               |                   | [3H]-Cytidine       | 148 ± 18      | 66.1 ± 6.4    | (***)        |
|               |                   | [3H]-Thymidine      | 34.4 ± 5.0    | 21.6 ± 2.5    | (*)          |
|               |                   | [3H]-2-deoxyuridine | 10.5 ± 3.7    | 46.2 ± 6.0    | (***)        |
|               |                   | [3H]-Gemcitabine    | 0.426 ± 0.16  | 0.036 ± 0.044 | (*)          |
|               |                   | [3H]-Cytarabine     | 0.102 ± 0.041 | 0.505 ± 0.22  | (ns)         |
|               |                   | [3H]-Uracil         | 90.7 ± 15     | 32.1 ± 7.6    | (**)         |
|               |                   | [3H]-Cytosine       | 93.2 ± 13     | 23.0 ± 8.8    | (***)        |
| <b>Purine</b> | [3H]-Adenosine    | 6.69 ± 1.7          | 39.9 ± 5.9    | (**)          |              |
|               | [3H]-Guanosine    | 70.6 ± 3.6          | -0.037 ± 0.14 | (****)        |              |
|               | [3H]-Inosine      | 71.6 ± 8.1          | 21.4 ± 4.4    | (****)        |              |
|               | [3H]-Adenine      | 133 ± 16            | 69.4 ± 9.8    | (**)          |              |
|               | [3H]-Hypoxanthine | 50.2 ± 2.6          | 67.5 ± 6.5    | (ns)          |              |

**b**

|               |                   | Substrate           | F249I (+OH)     | F249I (-OH)  | Significance |
|---------------|-------------------|---------------------|-----------------|--------------|--------------|
| <b>F249I</b>  | <b>Pyrimidine</b> | [3H]-UTP            | 70.3 ± 2.2      | 47.4 ± 5.9   | (*)          |
|               |                   | [3H]-Uridine        | 172 ± 7.9       | 67.4 ± 4.1   | (***)        |
|               |                   | [3H]-Cytidine       | 192 ± 29        | 72.3 ± 2.0   | (*)          |
|               |                   | [3H]-Thymidine      | 70.5 ± 4.5      | 18.5 ± 1.1   | (***)        |
|               |                   | [3H]-2-deoxyuridine | 154 ± 25        | 38.0 ± 2.2   | (**)         |
|               |                   | [3H]-Gemcitabine    | 0.197 ± 0.12    | 1.24 ± 0.22  | (**)         |
|               |                   | [3H]-Cytarabine     | -0.0460 ± 0.027 | 0.806 ± 0.10 | (***)        |
|               |                   | [3H]-Uracil         | 73.7 ± 7.9      | 30.4 ± 1.1   | (**)         |
|               |                   | [3H]-Cytosine       | 152 ± 19        | 72.4 ± 6.9   | (*)          |
| <b>Purine</b> | [3H]-Adenosine    | 84.0 ± 10           | 92.6 ± 2.8      | (ns)         |              |
|               | [3H]-Guanosine    | 26.8 ± 1.8          | 25.2 ± 0.74     | (ns)         |              |
|               | [3H]-Inosine      | 70.9 ± 1.5          | 58.3 ± 1.1      | (**)         |              |
|               | [3H]-Adenine      | 157 ± 7.2           | 181 ± 4.3       | (*)          |              |
|               | [3H]-Hypoxanthine | 179 ± 4.4           | 164 ± 6.9       | (ns)         |              |

**c**

|               |                   | Substrate           | L390A (+OH)    | L390A (-OH)   | Significance |
|---------------|-------------------|---------------------|----------------|---------------|--------------|
| <b>L390A</b>  | <b>Pyrimidine</b> | [3H]-UTP            | 56.3 ± 3.6     | 90.6 ± 1.6    | (***)        |
|               |                   | [3H]-Uridine        | 62.4 ± 4.9     | 78.3 ± 4.2    | (ns)         |
|               |                   | [3H]-Cytidine       | 89.0 ± 12      | 92.1 ± 8.1    | (ns)         |
|               |                   | [3H]-Thymidine      | 58.9 ± 2.0     | 43.4 ± 1.5    | (**)         |
|               |                   | [3H]-2-deoxyuridine | 92.8 ± 15      | 46.2 ± 1.9    | (ns)         |
|               |                   | [3H]-Gemcitabine    | 0.0203 ± 0.049 | 0.625 ± 0.25  | (*)          |
|               |                   | [3H]-Cytarabine     | 0.140 ± 0.036  | 0.168 ± 0.087 | (ns)         |
|               |                   | [3H]-Uracil         | 115 ± 18       | 4.89 ± 0.312  | (**)         |
|               |                   | [3H]-Cytosine       | 33.3 ± 4.4     | 38.6 ± 0.44   | (ns)         |
| <b>Purine</b> | [3H]-Adenosine    | 29.4 ± 3.2          | 44.7 ± 2.3     | (*)           |              |
|               | [3H]-Guanosine    | 16.3 ± 3.0          | 0.605 ± 0.080  | (**)          |              |
|               | [3H]-Inosine      | 55.4 ± 6.0          | 25.2 ± 3.4     | (**)          |              |
|               | [3H]-Adenine      | 73.1 ± 15           | 72.7 ± 7.9     | (ns)          |              |
|               | [3H]-Hypoxanthine | 45.0 ± 14           | 11.9 ± 9.8     | (ns)          |              |



Figure S6 (Boswell-Casteel, et al.)

| Substrate  |                     | Native<br>(-OH, N = 9) | L390A<br>(-OH, N = 3) | F249I<br>(-OH, N = 3) |
|------------|---------------------|------------------------|-----------------------|-----------------------|
| Pyrimidine | [3H]-UTP            | 24.6 ± 3.9             | 90.6 ± 1.6 (****)     | 47.4 ± 5.9 (*)        |
|            | [3H]-Uridine        | 46.9 ± 5.4             | 78.3 ± 4.2 (**)       | 67.4 ± 4.1 (ns)       |
|            | [3H]-Cytidine       | 66.1 ± 6.4             | 92.1 ± 8.1 (*)        | 72.3 ± 2.0 (ns)       |
|            | [3H]-Thymidine      | 21.6 ± 2.5             | 43.4 ± 1.5 (*)        | 18.5 ± 1.1 (ns)       |
|            | [3H]-2-deoxyuridine | 46.2 ± 6.0             | 46.2 ± 1.9 (ns)       | 38.0 ± 2.2 (ns)       |
|            | [3H]-Gemcitabine    | 0.036 ± 0.044          | 0.625 ± 0.25 (ns)     | 1.24 ± 0.22 (ns)      |
|            | [3H]-Cytarabine     | 0.505 ± 0.22           | 0.168 ± 0.087 (ns)    | 0.806 ± 0.10 (ns)     |
|            | [3H]-Uracil         | 32.1 ± 7.6             | 4.89 ± 0.312 (*)      | 30.4 ± 1.1 (ns)       |
|            | [3H]-Cytosine       | 23.0 ± 8.8             | 38.6 ± 0.44 (ns)      | 72.4 ± 6.9 (****)     |
| Purine     | [3H]-Adenosine      | 39.9 ± 5.9             | 44.7 ± 2.3 (ns)       | 92.6 ± 2.8 (****)     |
|            | [3H]-Guanosine      | -0.037 ± 0.14          | 0.605 ± 0.080 (ns)    | 25.2 ± 0.74 (*)       |
|            | [3H]-Inosine        | 21.4 ± 4.4             | 25.2 ± 3.4 (ns)       | 58.3 ± 1.1 (***)      |
|            | [3H]-Adenine        | 69.4 ± 9.8             | 72.7 ± 7.9 (ns)       | 181 ± 4.3 (****)      |
|            | [3H]-Hypoxanthine   | 67.5 ± 6.5             | 11.9 ± 9.8 (****)     | 164 ± 6.9 (****)      |

**Table S1 (Boswell-Casteel, et al.)**

| <b>Mulliken Charges on the C2' Carbon</b> |                        |                                     |
|-------------------------------------------|------------------------|-------------------------------------|
| <b>Substrate</b>                          | <b><i>in vacuo</i></b> | <b>Solvated with H<sub>2</sub>O</b> |
| Cytidine                                  | 0.154                  | 0.153                               |
| Uridine                                   | 0.157                  | 0.18                                |
| Gemcitabine                               | 0.802                  | 0.778                               |
| Thymidine                                 | -0.287                 | -0.294                              |
| 2'-deoxyuridine                           | -0.287                 | -0.295                              |
| Cytarabine                                | 0.167                  | 0.171                               |
